# Supplementary material for: Evaluation of chimeric antigen receptor T cell therapy in non-human primates infected with SHIV or SIV
Source: PubMed Central journal article supplement (PMC7984852; doi:10.1371/journal.pone.0248973), 2021-03-22
Supplement: pone.0248973.s005.pdf [file pone.0248973.s005.pdf]

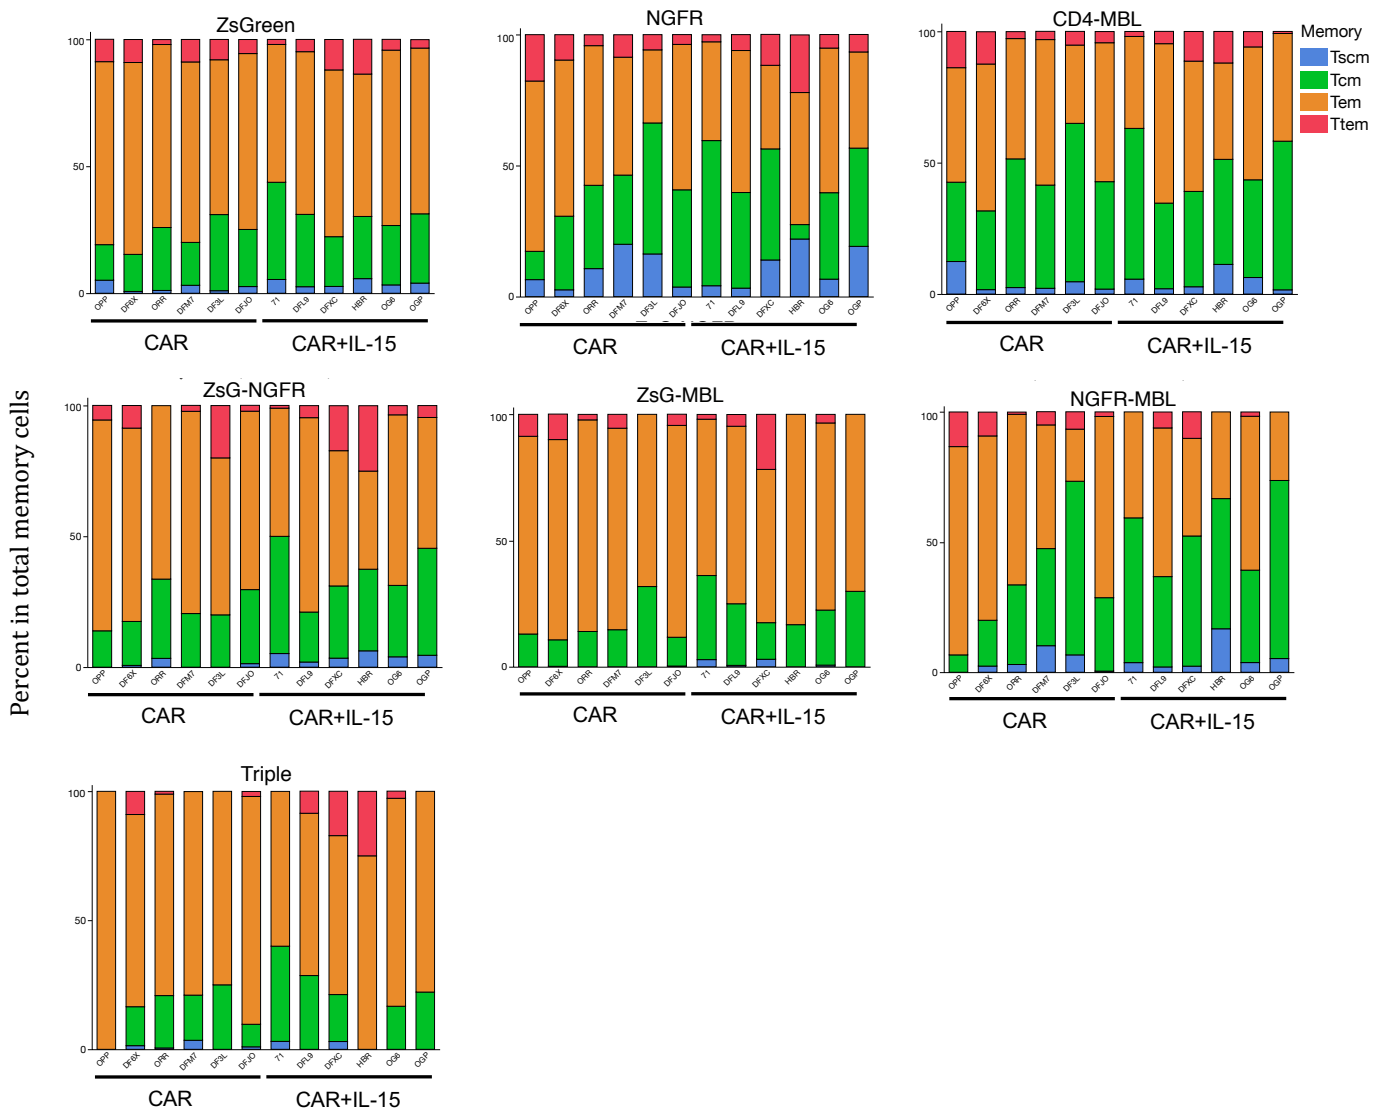

**S5 Fig. Distribution of anti-SIV CAR memory phenotype.** Percent of each memory fraction in CAR T cells at the time of transfer is demonstrated. T<sub>scm</sub>: Blue, T<sub>cm</sub>: Green, T<sub>em</sub>: Orange, T<sub>tcm</sub>: Red. Memory phenotypes are based on CCR and CD45RA expression. Each bar represents data from an animal.
