# Supplementary material for: Evaluation of chimeric antigen receptor T cell therapy in non-human primates infected with SHIV or SIV
Source: PubMed Central journal article supplement (PMC7984852; doi:10.1371/journal.pone.0248973), 2021-03-22
Supplement: pone.0248973.s006.pdf [file pone.0248973.s006.pdf]

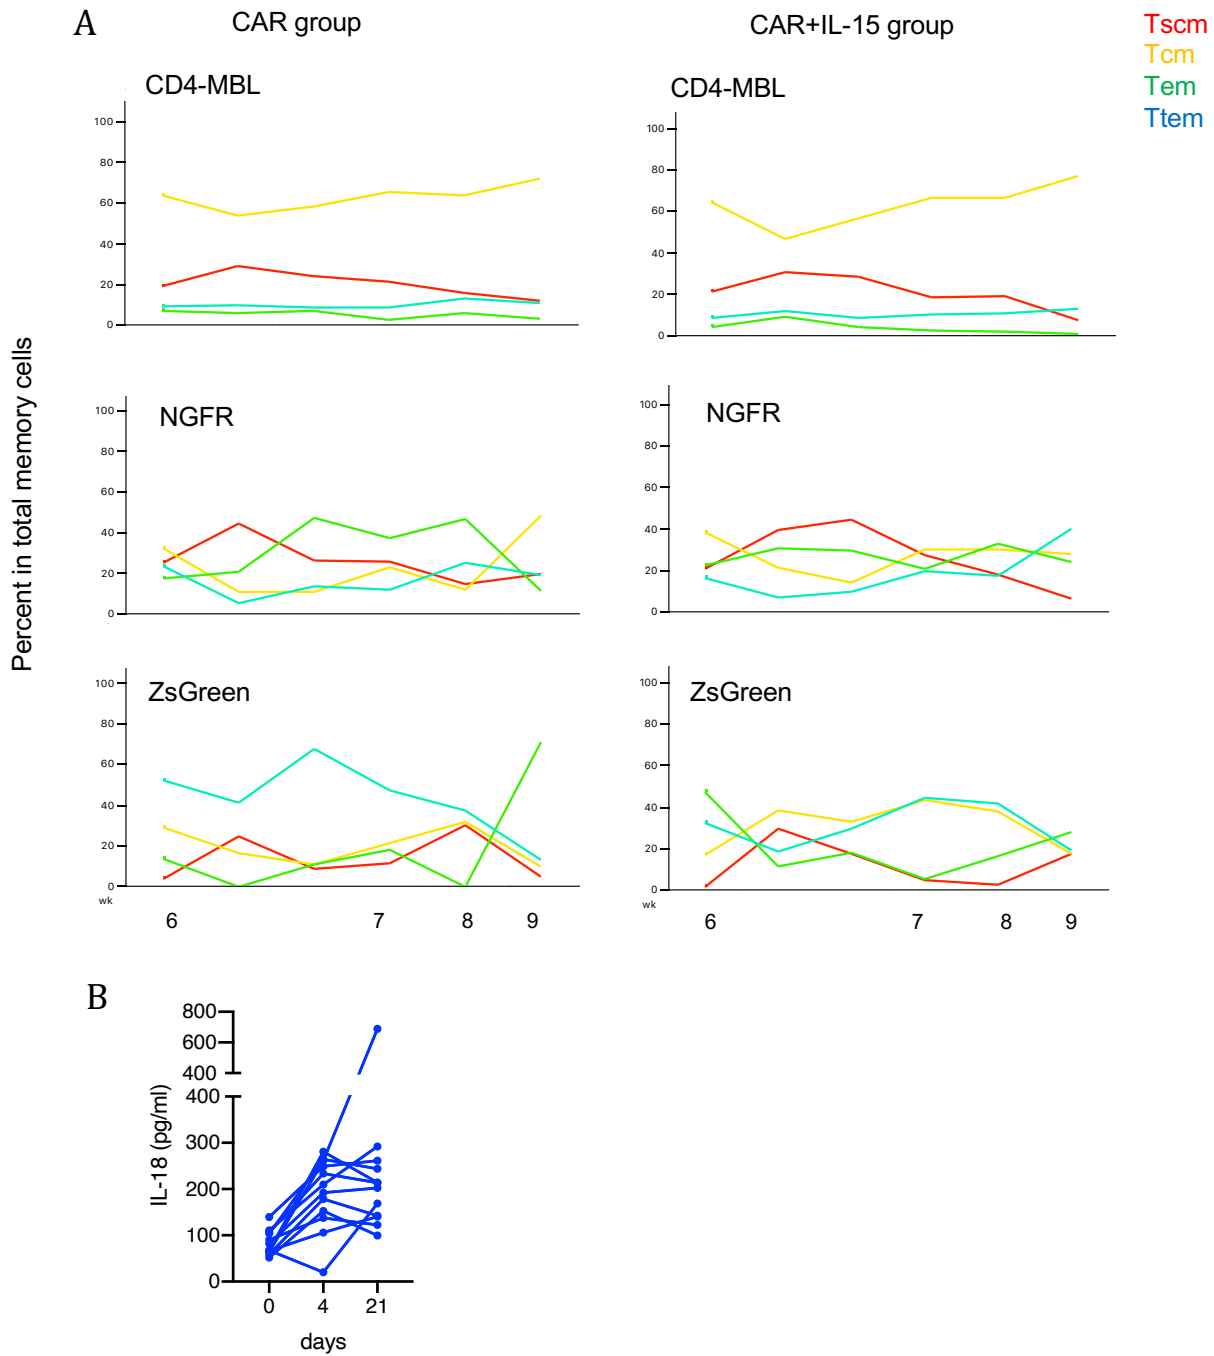

**S6 Fig. Transition of CAR T cell memory phenotype after in vivo transfer and serum IL-18 levels in IL-15 treated animals. (A)** Percent of each memory phenotype is shown in the graphs. Red: T<sub>SCM</sub>, yellow: T<sub>CM</sub>, green: T<sub>EM</sub>, blue: T<sub>TEM</sub>. **(B)** Plasma IL-18 measurement during hetIL-15 administration. Plasma IL-18 levels were determined at the indicated time points. Individual animals are shown.
